# Supplementary material for: Extended range forecasting of stream water temperature with deep learning models
Source: Copernicus journal article supplement (doi:10.5194/egusphere-2024-2591), 2024-08-27
Supplement: Supplementary file 1 [file egusphere-2024-2591-supplement.pdf]

# Supporting information: Extended range forecasting of stream water temperature with deep learning models

Ryan S. Padrón<sup>1,2</sup>, Massimiliano Zappa<sup>1</sup>, Luzi Bernhard<sup>1</sup>, Konrad Bogner<sup>1</sup>

<sup>1</sup>Research Unit Mountain Hydrology and Mass Movements, Swiss Federal Institute for Forest, Snow and Landscape  
5 Research WSL, Birmensdorf, 8903, Switzerland

<sup>2</sup>Institute for Atmospheric and Climate Science, ETH Zurich, Zurich, Switzerland

*Correspondence to:* Ryan S. Padrón ([ryan.padron@wsl.ch](mailto:ryan.padron@wsl.ch))

| Station ID | Name                                  | Area [km <sup>2</sup> ] | Mean elevation [m asl] | Glacierized fraction [%] | Coord X [m] | Coord Y [m] | Station elevation [m asl] | Water temp mean [°C] | Water temp stdev [°C] |
|------------|---------------------------------------|-------------------------|------------------------|--------------------------|-------------|-------------|---------------------------|----------------------|-----------------------|
| 2009       | Rhône - Porte du Scex                 | 5238                    | 2127                   | 11.1                     | 557660      | 133280      | 377                       | 8.36                 | 2.42                  |
| 2016       | Aare - Brugg                          | 11681                   | 1000                   | 1.5                      | 657000      | 259360      | 332                       | 13.31                | 5.76                  |
| 2018*      | Reuss - Mellingen                     | 3386                    | 1259                   | 1.8                      | 662830      | 252580      | 345                       | 13.41                | 6.01                  |
| 2019       | Aare - Brienzwiler                    | 555                     | 2135                   | 15.5                     | 649930      | 177380      | 570                       | 7.72                 | 2.21                  |
| 2029       | Aare - Brügg, Aegerten                | 8249                    | 1142                   | 2.1                      | 588220      | 219020      | 428                       | 13.12                | 5.91                  |
| 2030       | Aare - Thun                           | 2459                    | 1746                   | 6.9                      | 613230      | 179280      | 548                       | 12.39                | 4.90                  |
| 2034       | Broye - Payerne, Caserne d'aviation   | 416                     | 715                    | 0                        | 561660      | 187320      | 441                       | 13.01                | 6.87                  |
| 2044       | Thur - Andelfingen                    | 1702                    | 770                    | 0                        | 693510      | 272500      | 356                       | 12.98                | 6.46                  |
| 2056*      | Reuss - Seedorf                       | 833                     | 2013                   | 6.4                      | 690085      | 193210      | 438                       | 8.35                 | 3.15                  |
| 2068       | Ticino - Riazzino                     | 1613                    | 1643                   | 0.1                      | 713670      | 113500      | 200                       | 10.95                | 4.20                  |
| 2070*      | Emme - Emmenmatt, nur Hauptstation    | 443                     | 1065                   | 0                        | 623610      | 200430      | 638                       | 10.81                | 5.39                  |
| 2084       | Muota - Ingenbohl                     | 317                     | 1363                   | 0                        | 688262      | 206170      | 438                       | 9.32                 | 3.48                  |
| 2085*      | Aare - Hagneck                        | 5112                    | 1368                   | 3.4                      | 580680      | 211650      | 437                       | 13.18                | 5.21                  |
| 2091       | Rhein - Rheinfelden, Messstation      | 34524                   | 1068                   | 0.8                      | 627189      | 267845      | 265                       | 13.54                | 5.91                  |
| 2104       | Linth - Weesen, Biäsche               | 1062                    | 1584                   | 1.6                      | 725160      | 221380      | 419                       | 12.08                | 5.14                  |
| 2106       | Birs - Münchenstein, Hofmatt          | 887                     | 728                    | 0                        | 613570      | 263080      | 268                       | 12.28                | 4.97                  |
| 2109*      | Lütschine - Gsteig                    | 381                     | 2050                   | 13.5                     | 633130      | 168200      | 585                       | 7.81                 | 2.80                  |
| 2112       | Sitter - Appenzell                    | 74.4                    | 1256                   | 0.1                      | 749040      | 244220      | 769                       | 9.72                 | 5.13                  |
| 2113*      | Aare - Felsenau, K.W. Klingnau (U.W.) | 17687                   | 1060                   | 1.4                      | 659150      | 271790      | 312                       | 14.14                | 5.90                  |
| 2126       | Murg - Wängi                          | 80.2                    | 652                    | 0                        | 714105      | 261720      | 466                       | 12.50                | 4.85                  |
| 2135       | Aare - Bern, Schönau                  | 2941                    | 1596                   | 5.8                      | 600710      | 198000      | 502                       | 12.62                | 5.04                  |
| 2150*      | Landquart - Felsenbach                | 614                     | 1797                   | 0.7                      | 765364      | 204910      | 571                       | 8.55                 | 4.26                  |
| 2152       | Reuss - Luzern, Geissmattbrücke       | 2254                    | 1504                   | 2.8                      | 665330      | 211800      | 432                       | 13.34                | 5.84                  |
| 2159*      | Gürbe - Belp, Mülimatt                | 116                     | 846                    | 0                        | 604810      | 192680      | 522                       | 12.82                | 5.84                  |
| 2167       | Tresa - Ponte Tresa, Rocchetta        | 609                     | 803                    | 0                        | 709580      | 92145       | 268                       | 16.13                | 7.10                  |
| 2179       | Sense - Thörishaus, Sensematt         | 351                     | 1071                   | 0                        | 593350      | 193020      | 553                       | 11.62                | 6.39                  |
| 2210*      | Doubs - Ocourt                        | 1275                    | 952                    | 0                        | 572530      | 244460      | 417                       | 11.90                | 5.39                  |
| 2243       | Limmat - Baden, Limmatpromenade       | 2384                    | 1131                   | 0.7                      | 665640      | 258690      | 351                       | 13.83                | 6.51                  |
| 2256*      | Rosegbach - Pontresina                | 66.5                    | 2704                   | 21.7                     | 788795      | 151694      | 1766                      | 5.89                 | 4.23                  |
| 2269       | Lonza - Blatten                       | 77.4                    | 2624                   | 24.7                     | 629130      | 140910      | 1520                      | 5.87                 | 2.72                  |

|       |                                                 |       |      |      |        |        |      |       |      |
|-------|-------------------------------------------------|-------|------|------|--------|--------|------|-------|------|
| 2276  | Grosstalbach - Isenthal                         | 43.9  | 1819 | 6.7  | 685500 | 196050 | 767  | 8.51  | 2.09 |
| 2288  | Rhein - Neuhausen,<br>Flurlingerbrücke          | 11930 | 1239 | 0.6  | 689145 | 281975 | 383  | 13.29 | 6.53 |
| 2307* | Suze - Sonceboz                                 | 127   | 1036 | 0    | 579810 | 227350 | 642  | 10.03 | 2.79 |
| 2308  | Goldach - Goldach,<br>Bleiche, nur Hauptstation | 50.4  | 832  | 0    | 753190 | 261600 | 399  | 11.89 | 7.01 |
| 2343  | Langeten - Huttwil,<br>Häberenbad               | 59.9  | 760  | 0    | 629560 | 219135 | 597  | 10.81 | 4.06 |
| 2351* | Vispa - Visp                                    | 786   | 2648 | 23.1 | 634030 | 125900 | 659  | 7.54  | 2.86 |
| 2369  | Mentue - Yvonand, La<br>Mauguetaz               | 105   | 675  | 0    | 545440 | 180875 | 449  | 11.41 | 5.98 |
| 2374* | Necker - Mogelsberg,<br>Aachsäge                | 88.1  | 956  | 0    | 727110 | 247290 | 606  | 10.92 | 6.25 |
| 2392  | Rhein (Oberwasser) -<br>Rheinau                 | 11950 | 1238 | 0.6  | 687420 | 277140 | 353  | 13.28 | 6.49 |
| 2414  | Rietholzbach - Mosnang,<br>Rietholz             | 3.19  | 794  | 0    | 718840 | 248440 | 682  | 9.77  | 4.62 |
| 2415  | Glatt - Rheinsfelden                            | 417   | 503  | 0    | 678040 | 269720 | 336  | 14.25 | 5.94 |
| 2432  | Venoge - Ecublens, Les<br>Bois                  | 228   | 686  | 0    | 532040 | 154160 | 383  | 12.37 | 5.18 |
| 2433* | Aubonne - Allaman, Le<br>Coulet                 | 105   | 952  | 0    | 520720 | 147410 | 390  | 10.39 | 4.17 |
| 2457* | Aare - Ringgenberg,<br>Goldswil                 | 1138  | 1951 | 12.1 | 633730 | 171510 | 564  | 11.53 | 4.58 |
| 2462* | Inn - S-Chanf                                   | 616   | 2463 | 6.1  | 795800 | 165910 | 1645 | 7.09  | 4.26 |
| 2467  | Saane - Gümmenen                                | 1881  | 1131 | 0.1  | 585100 | 199240 | 473  | 11.61 | 5.35 |
| 2473* | Rhein - Diepoldsau,<br>Rietbrücke               | 6299  | 1771 | 0.7  | 766280 | 250360 | 410  | 9.49  | 3.91 |
| 2485* | Allaine - Boncourt,<br>Frontière                | 212   | 562  | 0    | 567830 | 261200 | 366  | 12.82 | 4.22 |
| 2493  | Promenthouse - Gland,<br>Route Suisse           | 120   | 1027 | 0    | 510080 | 140080 | 394  | 10.93 | 3.70 |
| 2604* | Biber - Biberbrugg                              | 31.9  | 1003 | 0    | 697240 | 223280 | 825  | 9.88  | 6.14 |
| 2608* | Sellenbodenbach -<br>Neuenkirch                 | 10.4  | 608  | 0    | 658530 | 218290 | 515  | 11.75 | 5.51 |
| 2612  | Riale di Pincascia -<br>Lavertezzo              | 44.5  | 1705 | 0    | 708060 | 123950 | 536  | 8.98  | 5.78 |
| 2617  | Rom - Müstair                                   | 128   | 2184 | 0    | 830800 | 168700 | 1236 | 7.50  | 3.37 |
| 2623  | Rhone - Oberwald                                | 93.3  | 2466 | 19.3 | 669870 | 154080 | 1368 | 5.25  | 2.42 |

10

**Table S1:** List of 54 stream water temperature stations from the Swiss Federal Office for the Environment monitoring network (<https://www.hydrodaten.admin.ch/en/>) with their corresponding characteristics used as static features when training the deep learning models. \*Indicates the subset of stations not used for training the models when evaluating the predictive skill at new and ungauged stations.

15

| Model | Hyperparameter         | Tuning space | Tuned value |
|-------|------------------------|--------------|-------------|
| RNNED | hidden_size            | 32 – 128     | 116         |
|       | rnn_layers             | 1 – 4        | 1           |
|       | gradient_clip_val      | 0.1 – 0.3    | 0.144       |
|       | dropout                | 0 – 0.3      | 0.276       |
| TFT   | hidden_size            | 32 – 128     | 60          |
|       | hidden_continuous_size | 8 – 32       | 12          |
|       | lstm_layers            | 1 – 4        | 2           |
|       | attention_head_size    | 1 – 4        | 1           |
|       | gradient_clip_val      | 0.1 – 0.3    | 0.204       |
|       | learning_rate          | 0.001 – 0.1  | 0.0033      |
|       | dropout                | 0 – 0.3      | 0.222       |
| NHITS | hidden_size            | 32 – 128     | 51          |
|       | num_blocks             | 1 – 3        | 3           |
|       | num_stacks             | 1 – 3        | 3           |
|       | gradient_clip_val      | 0.1 – 0.3    | 0.105       |
|       | learning_rate          | 0.001 – 0.1  | 0.0033      |
|       | dropout                | 0 – 0.3      | 0.173       |

**Table S2:** Hyperparameters of the deep learning models, the explored hyperparameter space, and their tuned values. Hyperparameter names are in agreement with the PyTorch Forecasting documentation (<https://pytorch-forecasting.readthedocs.io/en/stable/models.html>).

| Number | Forecast start date | Number | Forecast start date | Number | Forecast start date |
|--------|---------------------|--------|---------------------|--------|---------------------|
| 1      | 2022-01-03          | 31     | 2022-04-18          | 61     | 2022-08-08          |
| 2      | 2022-01-06          | 32     | 2022-04-21          | 62     | 2022-08-11          |
| 3      | 2022-01-10          | 33     | 2022-04-25          | 63     | 2022-08-15          |
| 4      | 2022-01-13          | 34     | 2022-04-28          | 64     | 2022-08-18          |
| 5      | 2022-01-17          | 35     | 2022-05-02          | 65     | 2022-08-22          |
| 6      | 2022-01-20          | 36     | 2022-05-05          | 66     | 2022-08-25          |
| 7      | 2022-01-24          | 37     | 2022-05-09          | 67     | 2022-08-29          |
| 8      | 2022-01-27          | 38     | 2022-05-12          | 68     | 2022-09-01          |
| 9      | 2022-01-31          | 39     | 2022-05-16          | 69     | 2022-09-05          |
| 10     | 2022-02-03          | 40     | 2022-05-19          | 70     | 2022-09-15          |
| 11     | 2022-02-07          | 41     | 2022-05-23          | 71     | 2022-09-19          |
| 12     | 2022-02-10          | 42     | 2022-05-26          | 72     | 2022-09-22          |
| 13     | 2022-02-14          | 43     | 2022-05-30          | 73     | 2022-09-26          |
| 14     | 2022-02-17          | 44     | 2022-06-02          | 74     | 2022-09-29          |
| 15     | 2022-02-21          | 45     | 2022-06-06          | 75     | 2022-10-06          |
| 16     | 2022-02-24          | 46     | 2022-06-09          | 76     | 2022-10-10          |
| 17     | 2022-02-28          | 47     | 2022-06-13          | 77     | 2022-10-13          |
| 18     | 2022-03-03          | 48     | 2022-06-16          | 78     | 2022-10-17          |
| 19     | 2022-03-07          | 49     | 2022-06-20          | 79     | 2022-10-20          |
| 20     | 2022-03-10          | 50     | 2022-06-23          | 80     | 2022-10-24          |
| 21     | 2022-03-14          | 51     | 2022-06-27          | 81     | 2022-10-27          |
| 22     | 2022-03-17          | 52     | 2022-07-07          | 82     | 2022-10-31          |
| 23     | 2022-03-21          | 53     | 2022-07-11          | 83     | 2022-11-03          |
| 24     | 2022-03-24          | 54     | 2022-07-14          | 84     | 2022-11-07          |
| 25     | 2022-03-28          | 55     | 2022-07-18          | 85     | 2022-11-10          |
| 26     | 2022-03-31          | 56     | 2022-07-21          | 86     | 2022-11-14          |
| 27     | 2022-04-04          | 57     | 2022-07-25          | 87     | 2022-11-17          |
| 28     | 2022-04-07          | 58     | 2022-07-28          | 88     | 2022-11-21          |
| 29     | 2022-04-11          | 59     | 2022-08-01          | 89     | 2022-11-24          |
| 30     | 2022-04-14          | 60     | 2022-08-04          | 90     | 2022-11-28          |

**Table S3:** List of forecast start dates during 2022 used for model evaluation. Forecasts are generated twice per week, with data missing for 2022-06-30, 2022-07-04, 2022-09-08, 2022-09-12, and 2022-10-03.

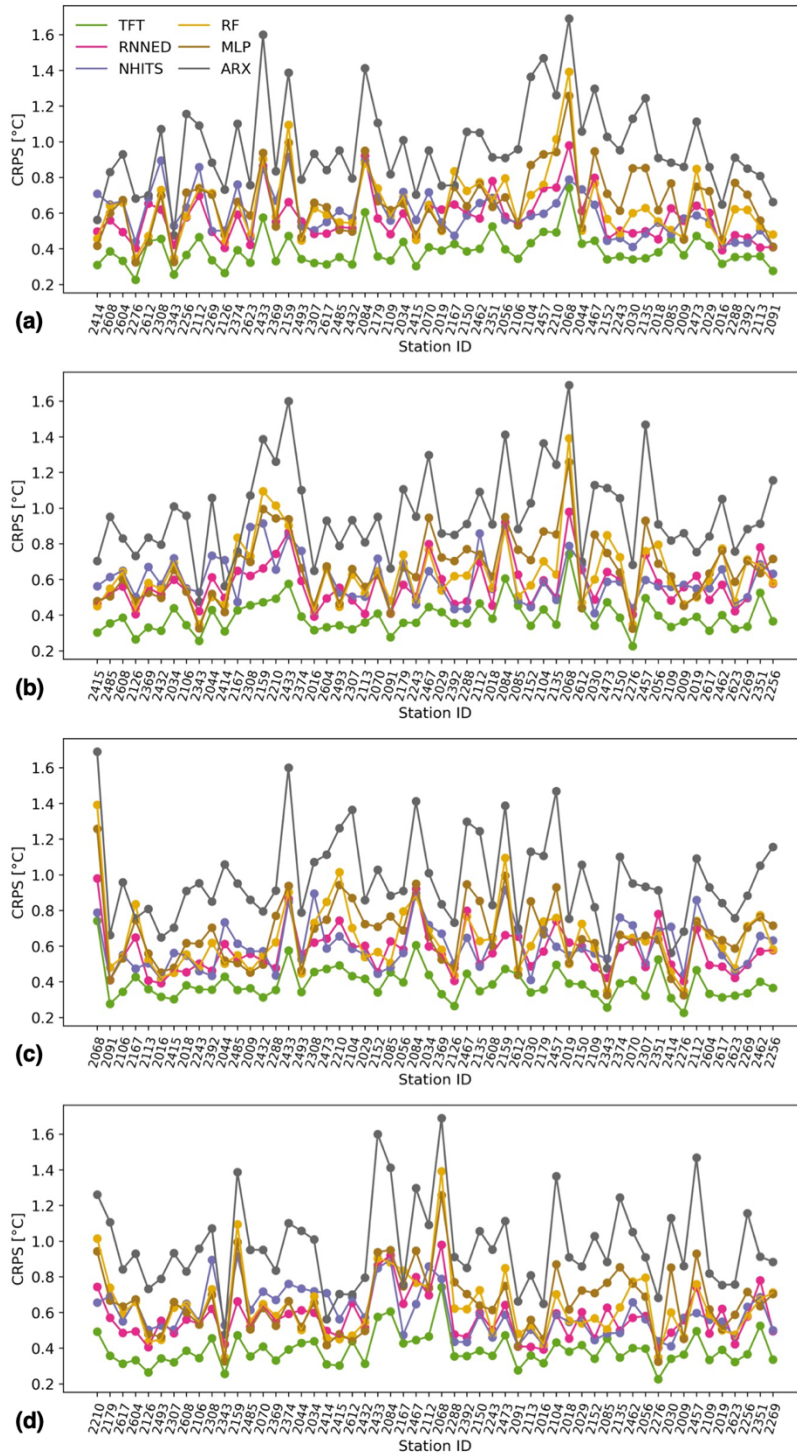

40

**Figure S1:** Model predictive skill per station when omitting the uncertainty of meteorological forecasts. Stations are sorted in ascending fashion according to (a) catchment area, (b) mean catchment elevation, (c) station elevation, and (d) glacierized fraction when omitting the uncertainty of meteorological forecasts. The CRPS is averaged over all lead times and forecasts.

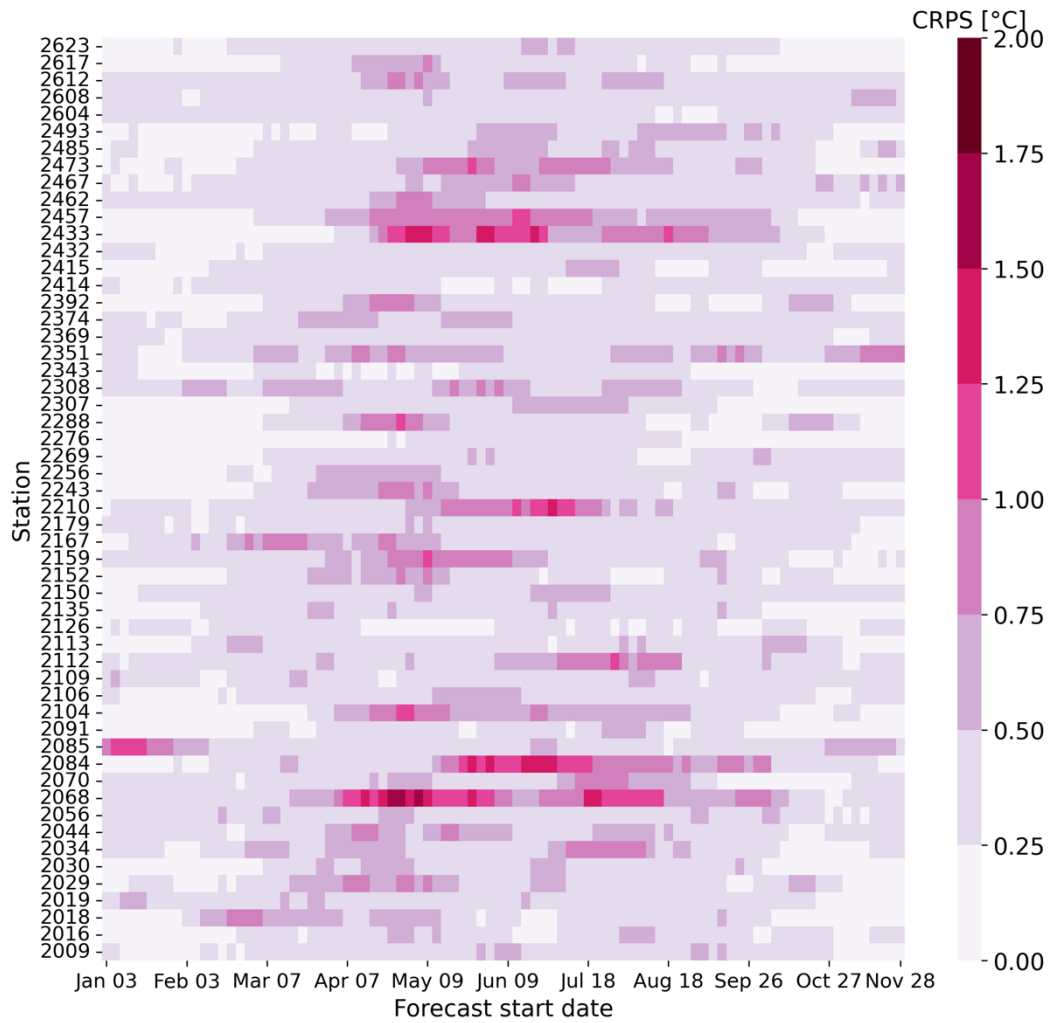

**Figure S2:** TFT predictive skill per forecast start date and station when omitting the uncertainty of meteorological forecasts. The CRPS is averaged over all lead times.

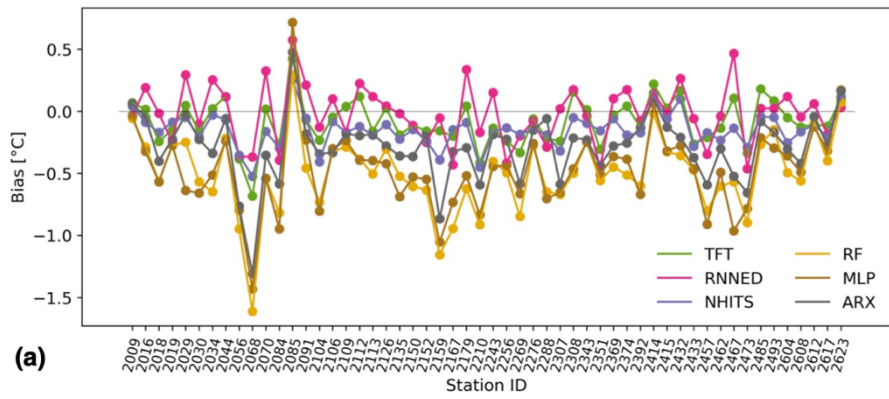

(a)

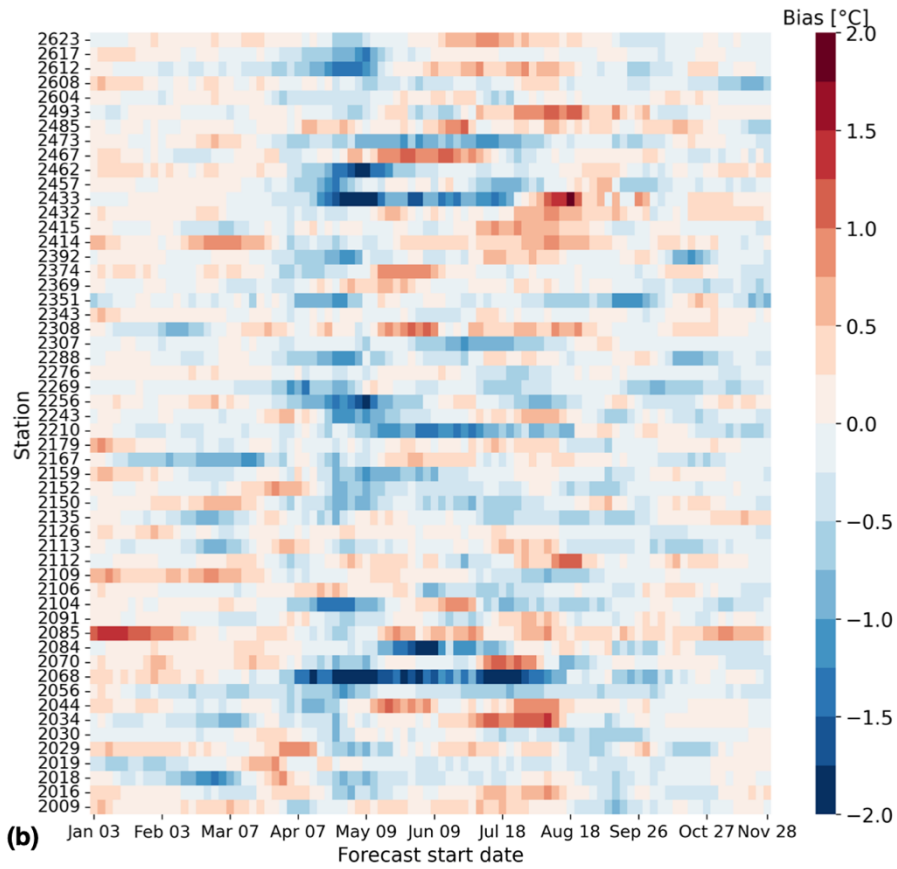

(b)

**Figure S3:** Water temperature forecast bias when omitting the uncertainty of meteorological forecasts. (a) Model comparison of forecast bias as a function of station averaged over all lead times and forecast start dates. (b) TFT forecast bias per forecast start date and station averaged over all lead times.

60



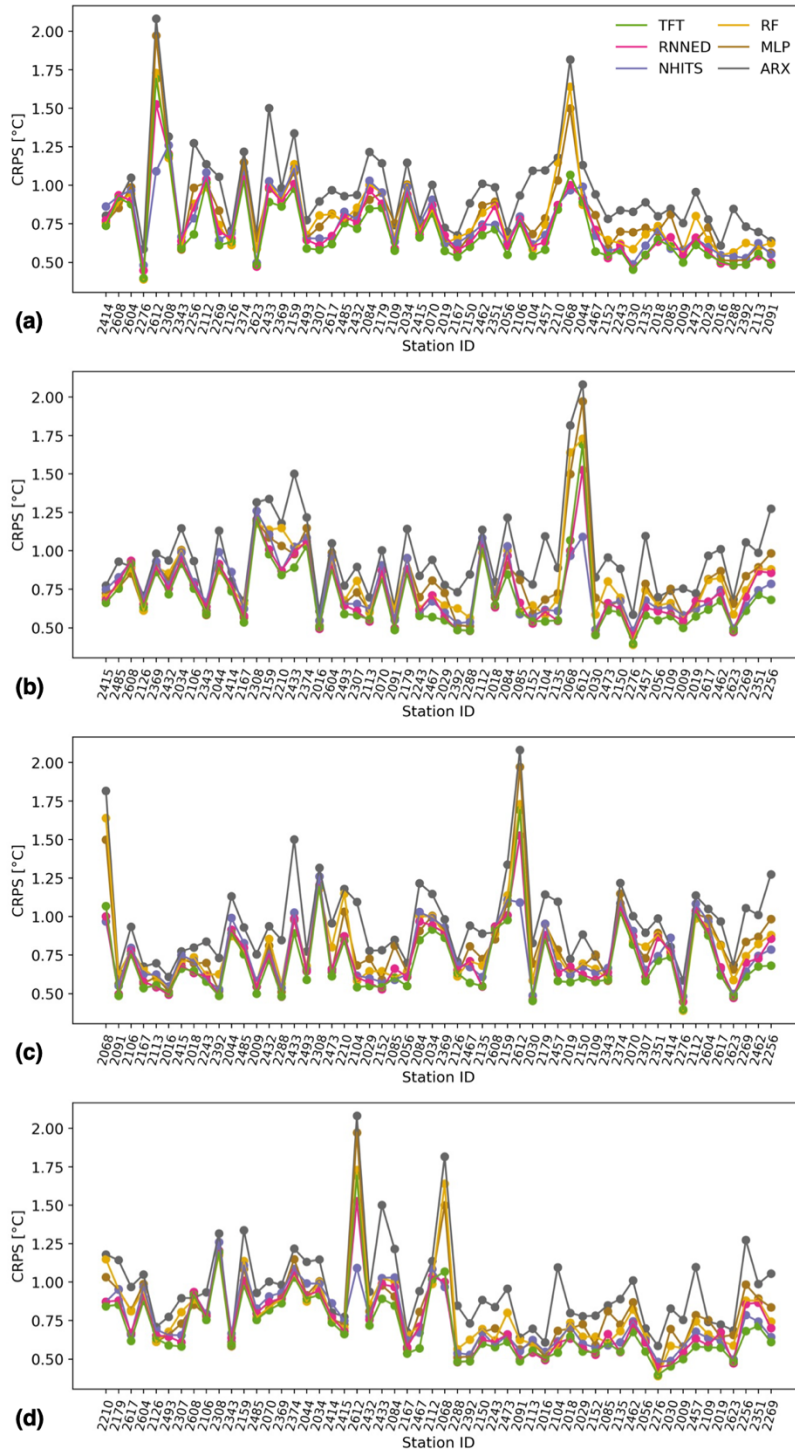

**Figure S4:** Model predictive skill per station when including the uncertainty of meteorological forecasts. Stations are sorted in ascending fashion according to (a) catchment area, (b) mean catchment elevation, (c) station elevation, and (d) glacierized fraction when omitting the uncertainty of meteorological forecasts. The CRPS is averaged over all lead times and forecasts.

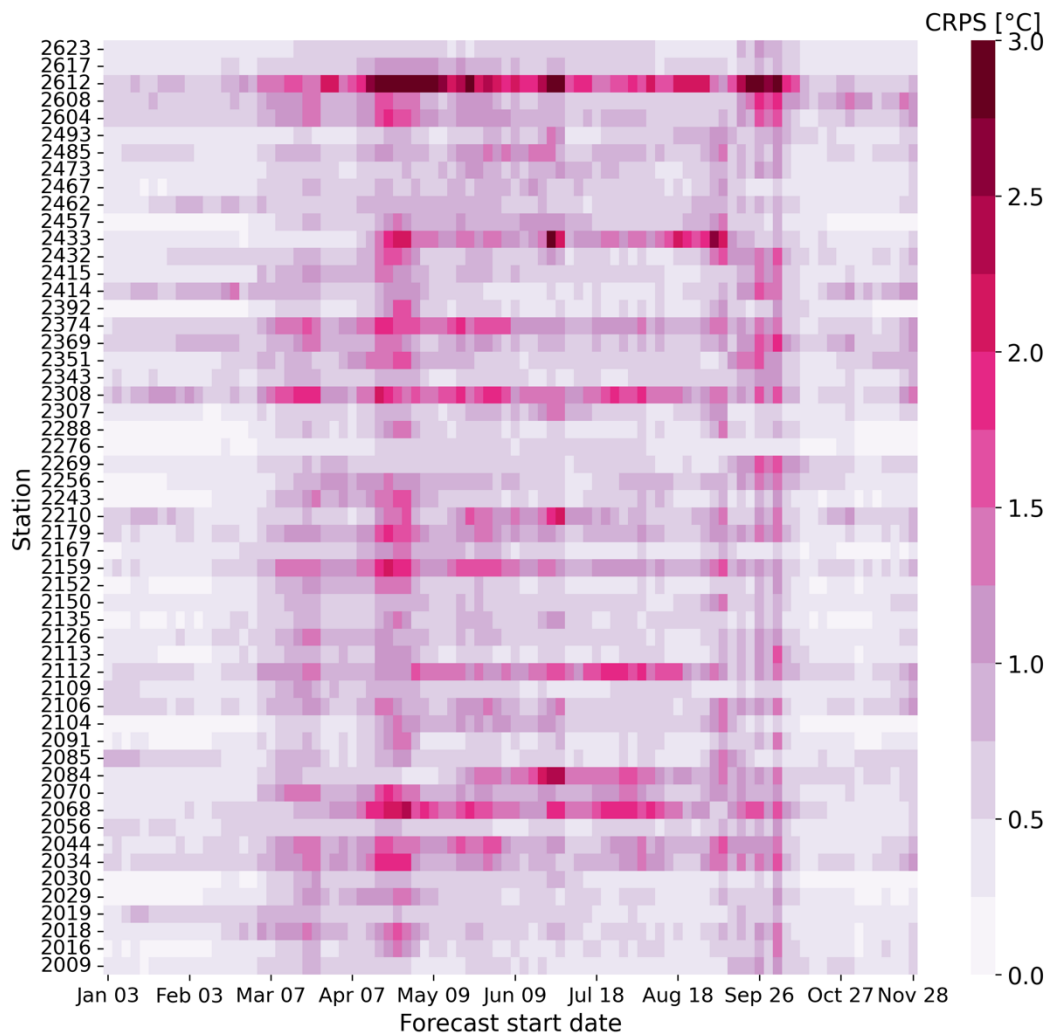

70 **Figure S5:** TFT predictive skill per forecast start date and station when including the uncertainty of meteorological forecasts. The CRPS is averaged over all lead times.

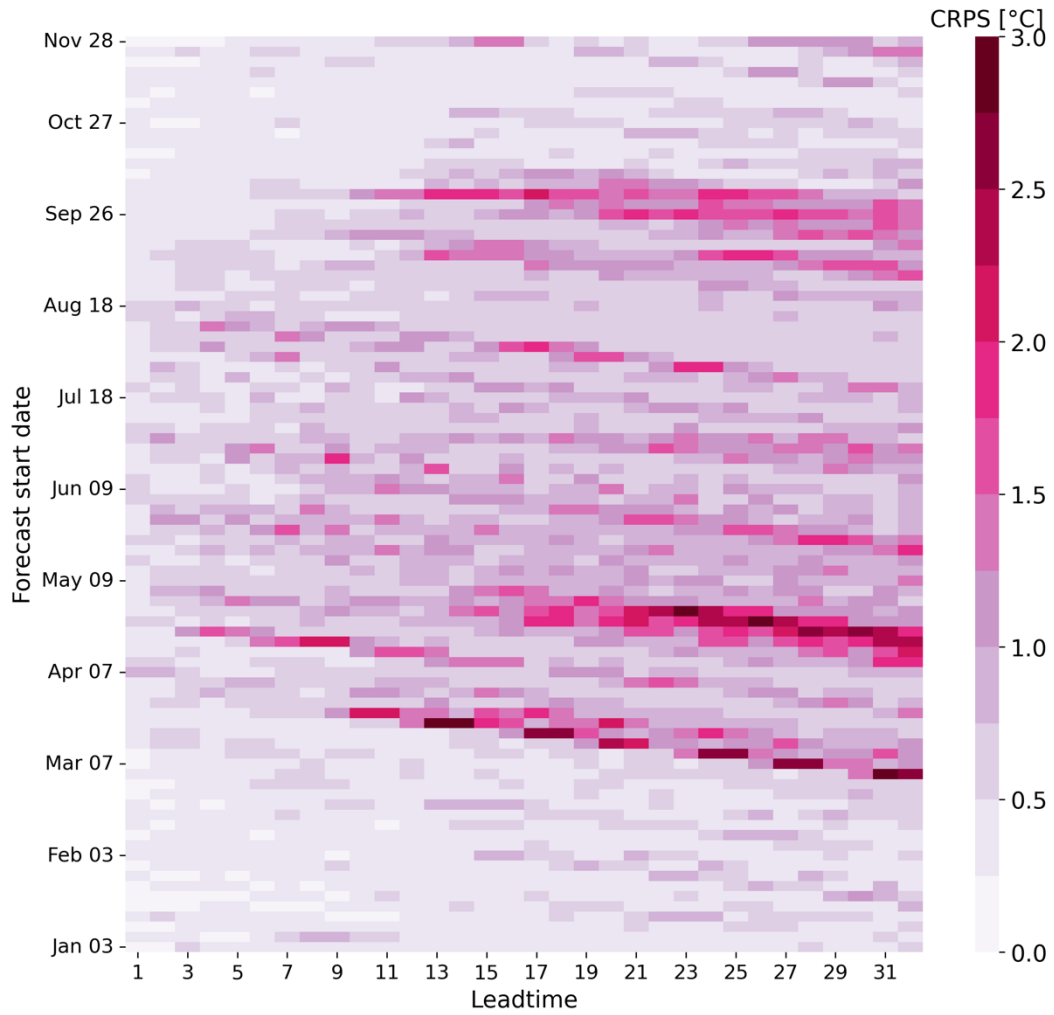

**Figure S6:** TFT predictive skill per lead time and forecast start date when including the uncertainty of meteorological forecasts. The CRPS is averaged over all stations.

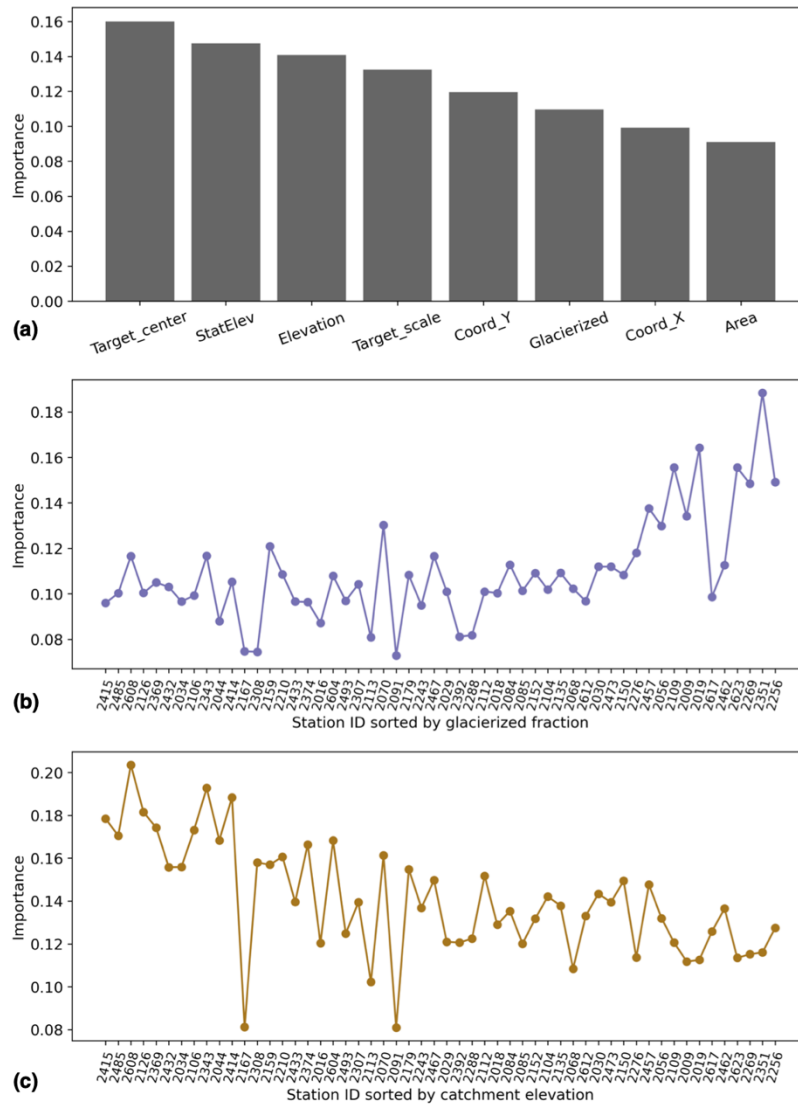

**Figure S7:** TFT static feature importance. **(a)** Feature importance averaged over 10 random seeds and 54 stations. **(b)** Glacierized fraction importance per station, with stations sorted according to the glacierized fraction of their catchments. **(c)** Catchment elevation importance per station, with stations sorted according to their mean catchment elevation.

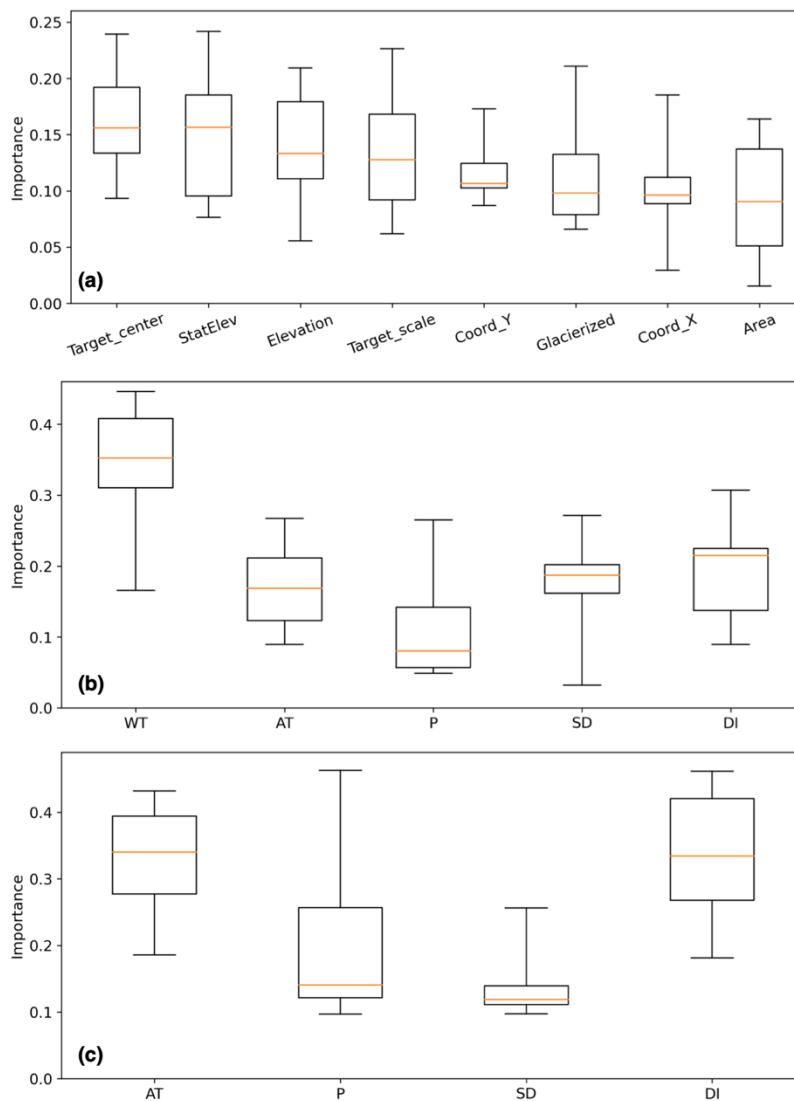

**Figure S8:** TFT average feature *importance* variability across 10 models trained with different random seeds. Results are shown for **(a)** static features, **(b)** encoder features, and **(c)** decoder features. Boxplots indicate the minimum, median, maximum, and interquartile range of the average *importance* across time steps, stations and forecast start dates.

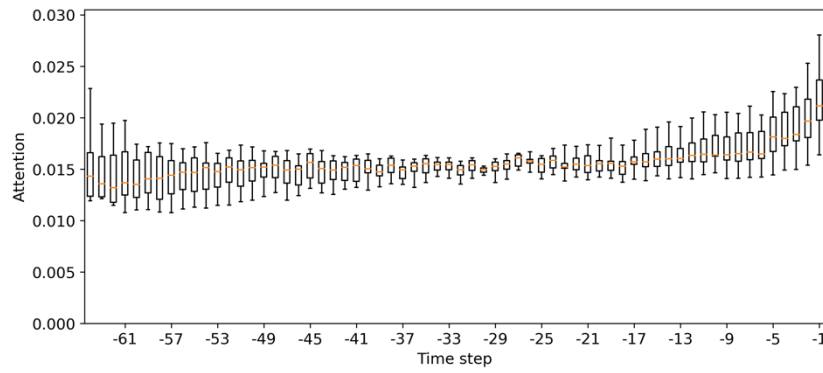

110 **Figure S9:** TFT *attention* variability across 10 models trained with different random seeds as a function of encoder time step. Boxplots indicate the minimum, median, maximum, and interquartile range of the average *attention* across stations and forecast start dates.
